# Supplementary material for: Comparison of Innovative and Traditional Cardiometabolic Indices in Estimating Atherosclerotic Cardiovascular Disease Risk in Adults
Source: PubMed Central journal article supplement (PMC8067018; doi:10.3390/diagnostics11040603), 2021-03-28
Supplement: diagnostics-11-00603-s001.pdf [file diagnostics-11-00603-s001.pdf]

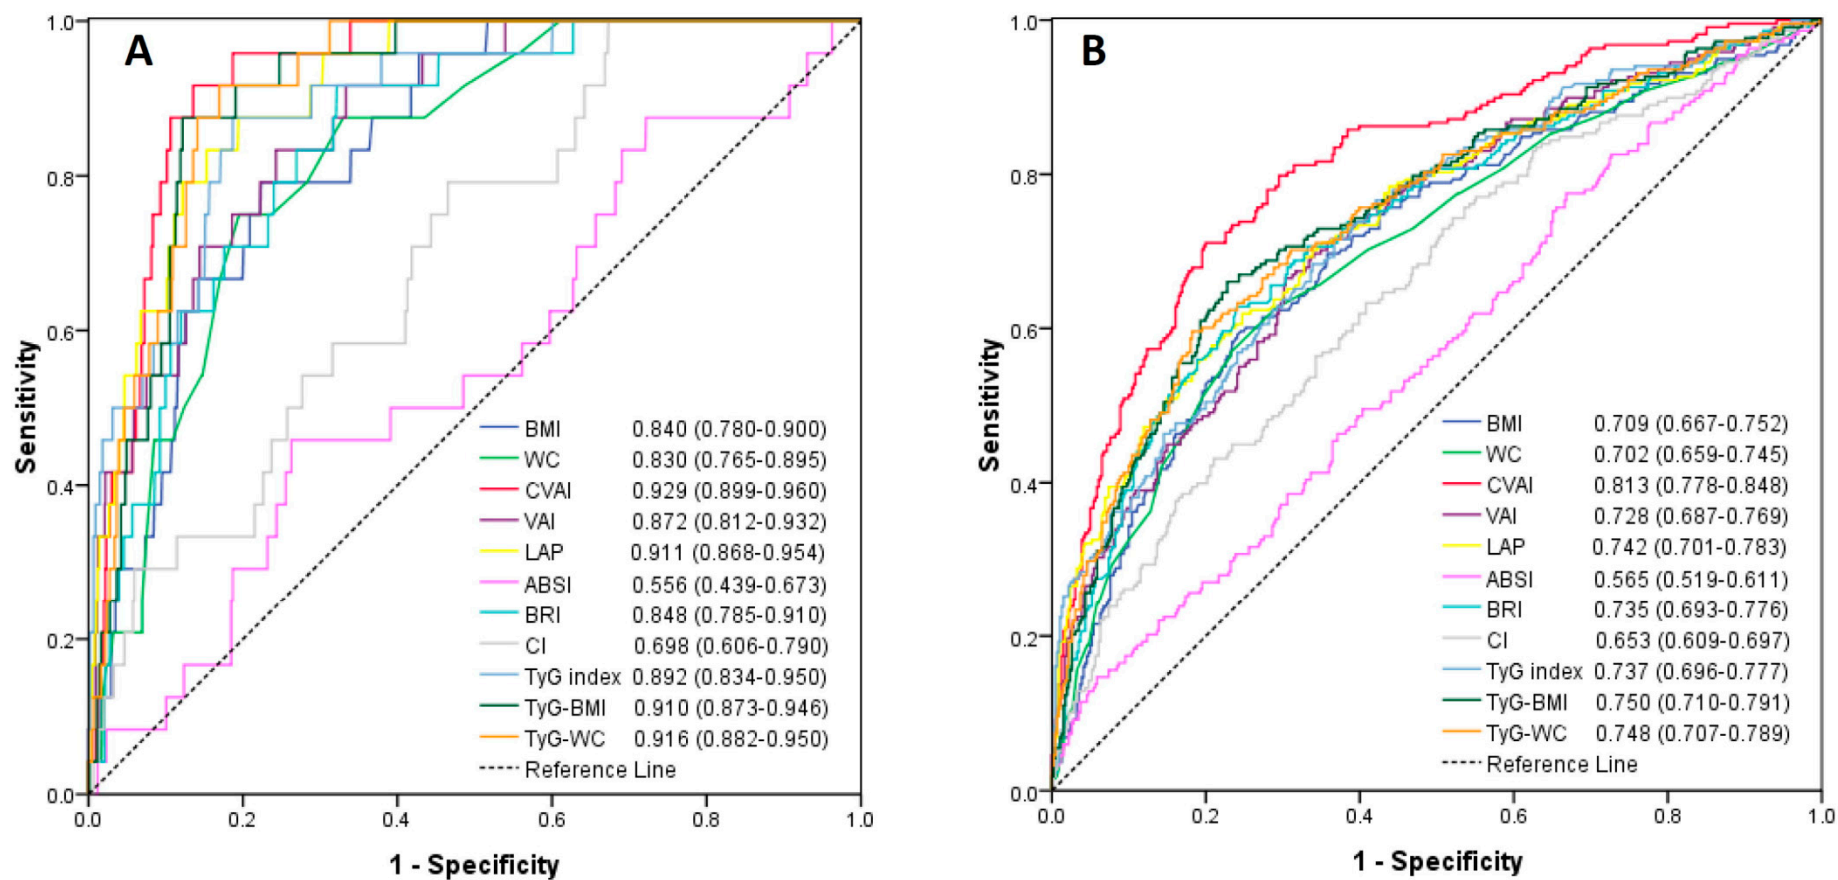

**Figure S1.** Receiver-operating characteristic curves of anthropometric and cardiometabolic indices for estimating 10-year ASCVD risk  $\geq 7.5\%$  in women with the age  $\leq 50$  years (**A**) and the age  $> 50$  years (**B**).
